# Supplementary material for: New 19F NMR methodology reveals structures of molecules in complex mixtures of fluorinated compounds
Source: Royal Society of Chemistry journal article supplement (doi:10.1039/d1sc06057k), 2022-01-01
Supplement: d1sc06057k1.pdf [file d1sc06057k1.pdf]

## Supplementary Information

### New $^{19}\text{F}$ NMR methodology reveals structures of molecules in complex mixtures of fluorinated compounds

Alan J. R. Smith, Richard York, Dušan Uhrín and Nicholle G. A. Bell\*

EaStCHEM School of Chemistry, University of Edinburgh, David Brewster Rd, Edinburgh, EH9 3FJ, UK.

\*Corresponding Author: Nicholle Bell - School of Chemistry, University of Edinburgh, Joseph Black Building, Kings Buildings, David Brewster Road, EH93FJ. Email: [Nicholle.Bell@ed.ac.uk](mailto:Nicholle.Bell@ed.ac.uk), Orcid: 0000-0001-7887-2659

### Table of Contents

|                                                                                                                                                                                              |   |
|----------------------------------------------------------------------------------------------------------------------------------------------------------------------------------------------|---|
| <b>Fig. S1.</b> Vertical expansions of a 500 MHz $^1\text{H}$ -decoupled 1D $^{19}\text{F}$ spectrum of the reaction mixture of chloraminated 3-fluoro-4-hydroxybenzoic acid, <b>1</b> ..... | 2 |
| <b>Fig. S2.</b> Aromatic region of a 800 MHz $^1\text{H}$ NMR spectrum of the reaction product mixture after chloramination of <b>1</b> .....                                                | 3 |
| <b>Fig. S3.</b> Partial 2D $^1\text{H}$ , $^{19}\text{F}$ HETCOR spectrum of the reaction product mixture.....                                                                               | 3 |
| <b>Fig. S4.</b> 2D $^{19}\text{F}$ DOSY spectrum of the reaction product mixture.....                                                                                                        | 4 |
| <b>Fig. S5.</b> 2D $^{19}\text{F}$ , $^{15}\text{N}$ HMBC spectrum of the reaction product mixture .....                                                                                     | 4 |
| <b>Fig. S6.</b> 800 MHz 2D $^1\text{H}$ , $^{15}\text{N}$ HSQC spectrum of the reaction product mixture .....                                                                                | 5 |

#### $^{19}\text{F}$ -centered pulse sequences

|                                                                                                                    |    |
|--------------------------------------------------------------------------------------------------------------------|----|
| <b>Fig. S7.</b> Variable-time z-filtered $^{19}\text{F}$ -detected 2D $^1\text{H}$ , $^{19}\text{F}$ HETCOR.....   | 6  |
| <b>Fig. S8.</b> Variable-time $^{19}\text{F}$ -detected 2D $^1\text{H}$ , $^{19}\text{F}$ TOCSY-HETCOR.....        | 7  |
| <b>Fig. S9.</b> 2D $^{19}\text{F}$ , $^1\text{H}$ CP-DIPSI3-DIPSI2.....                                            | 8  |
| <b>Fig. S10.</b> 2D $^{19}\text{F}$ , $^{13}\text{C}$ HMBC optimised for $^nJ_{\text{FC}}$ coupling constants..... | 9  |
| <b>Fig. S11.</b> 2D $^{19}\text{F}$ , $^{13}\text{C}$ HMBC optimised for $^1J_{\text{FC}}$ coupling constants..... | 10 |
| <b>Fig. S12.</b> (3, 2)D $\text{H}^1\text{C}^n\text{F}$ .....                                                      | 11 |

#### Tables

|                                                                                                                                                         |    |
|---------------------------------------------------------------------------------------------------------------------------------------------------------|----|
| <b>Table S1.</b> Parameters of NMR experiments performed on the reaction mixture.....                                                                   | 12 |
| <b>Table S2.</b> Summary of $^nJ_{\text{HF}}$ coupling constants for the 13 characterised compounds.....                                                | 12 |
| <b>Table S3.</b> Summary of $^{1,n}J_{\text{FC}}$ coupling constants for the 13 characterised compounds.....                                            | 13 |
| <b>Table S3.</b> Summary of $^{13}\text{C}$ -induced chemical shifts for the 13 characterised compounds....                                             | 13 |
| <b>Table S5.</b> Summary of $^{19}\text{F}$ , $^1\text{H}$ , $^{13}\text{C}$ and $^{15}\text{N}$ NMR parameters for the 13 characterised compounds..... | 14 |

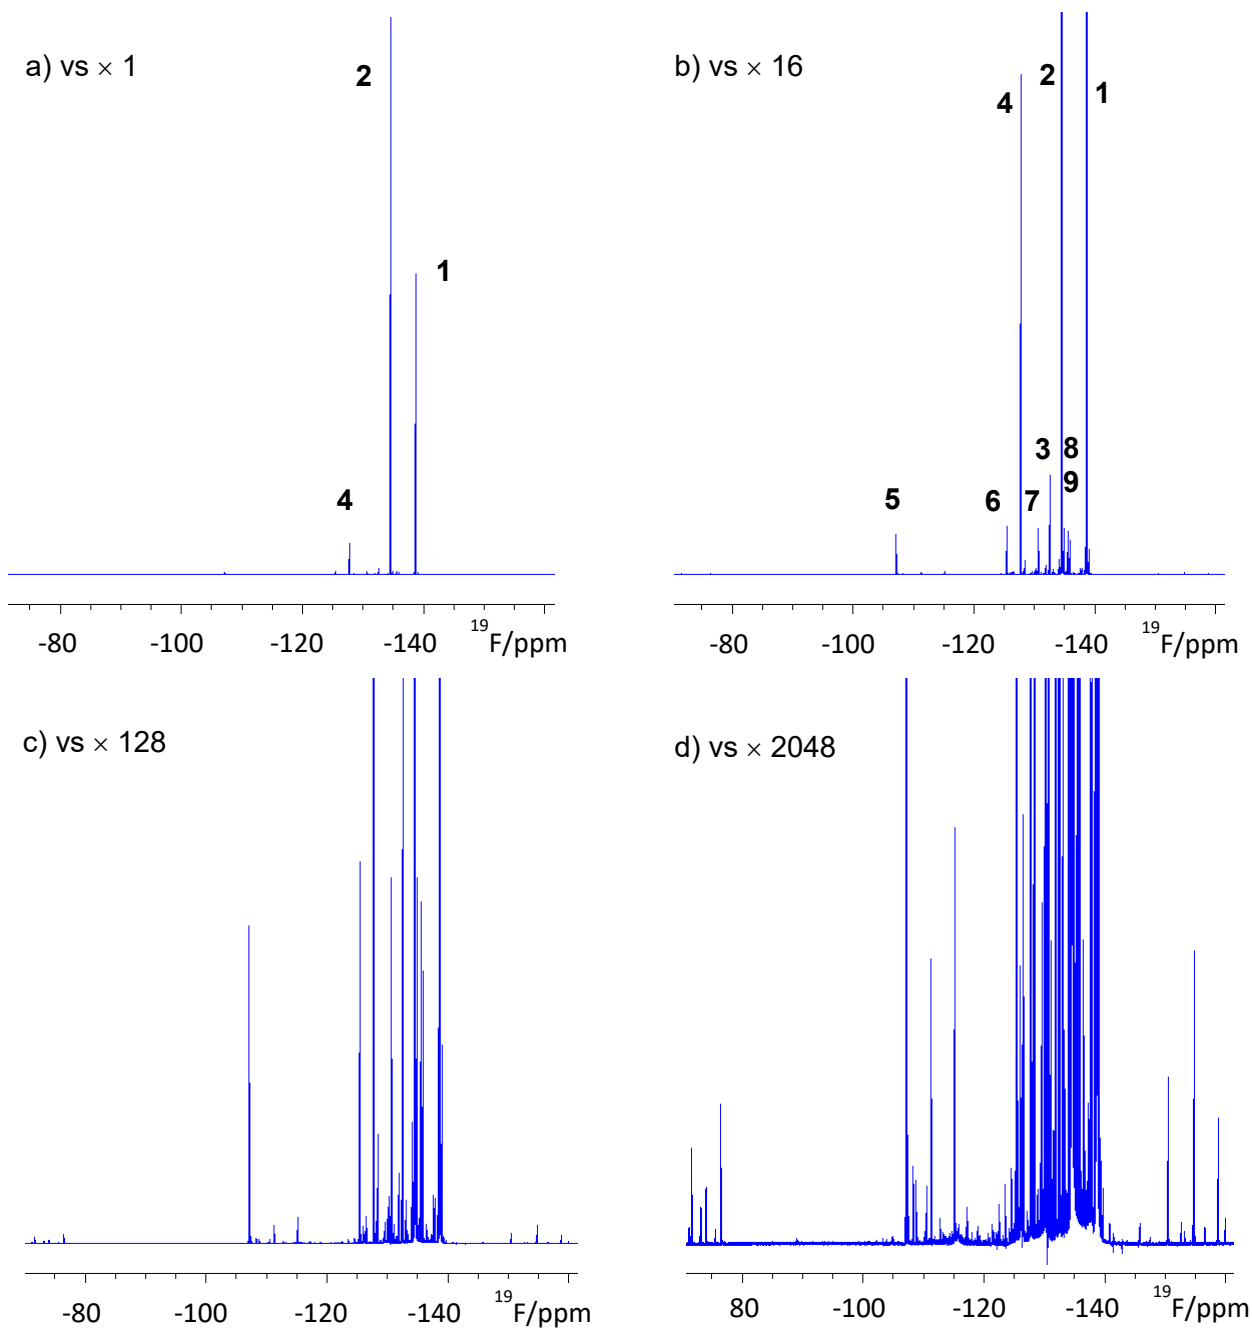

**Fig. S1.** A 500 MHz  $^1\text{H}$ -decoupled 1D  $^{19}\text{F}$  spectrum of a mixture produced by chloramination of 3-fluoro-4-hydroxybenzoic acid (**1**) using  $^{15}\text{NH}_4\text{Cl}$ . (a)-(d) show vertical expansions scaled as indicated.

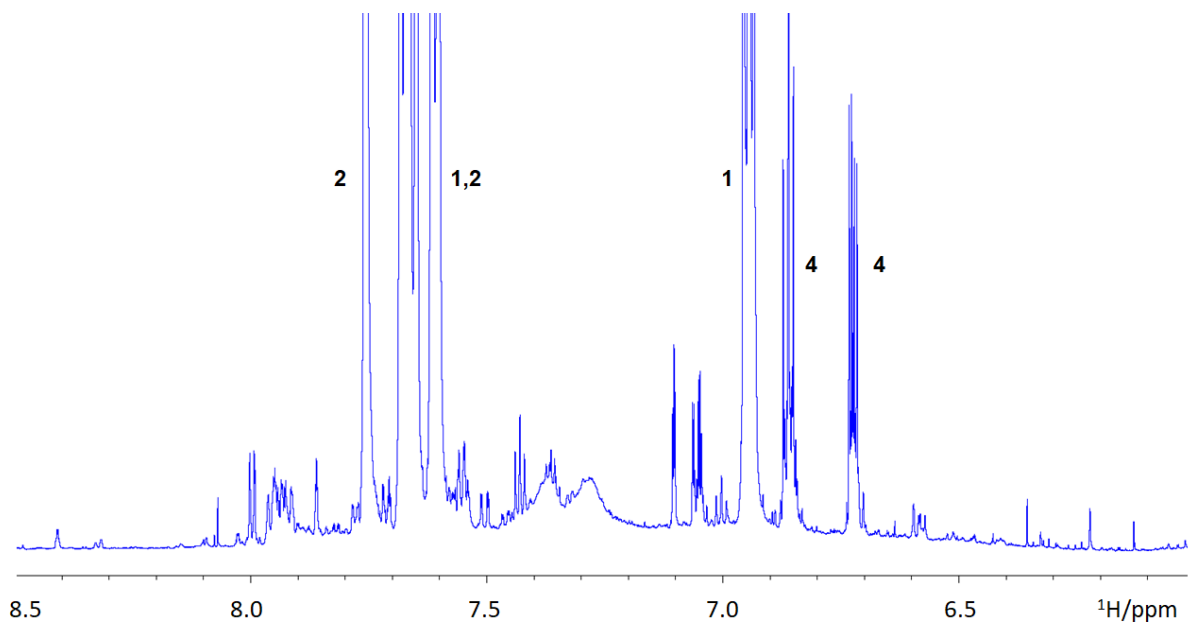

**Fig. S2.** Aromatic region of an 800 MHz 1D  $^1\text{H}$  spectrum of a mixture produced by chloramination of 3-fluoro-4-hydroxybenzoic acid (**1**) using  $^{15}\text{NH}_4\text{Cl}$ . The spectrum is dominated by the signals of major compounds **1**, **2** and **4**.

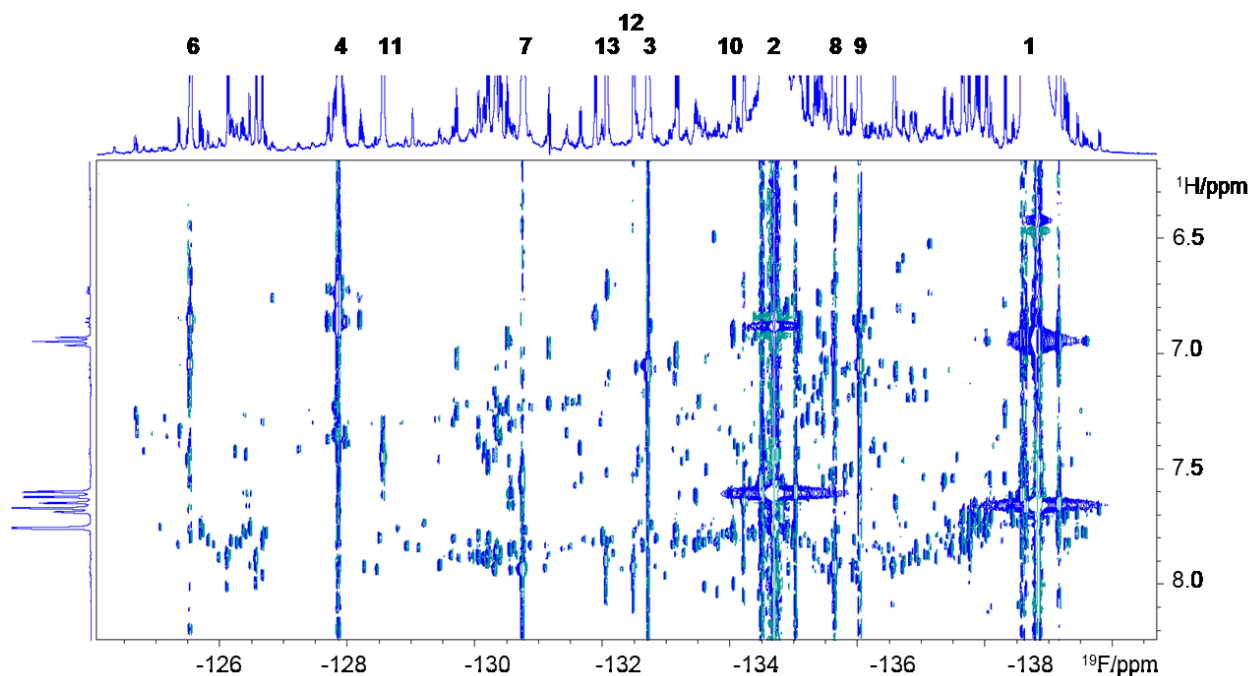

**Fig. S3.** A large section of a 2D  $^1\text{H}$ ,  $^{19}\text{F}$  HETCOR spectrum of the mixture produced by chloramination of **1**.

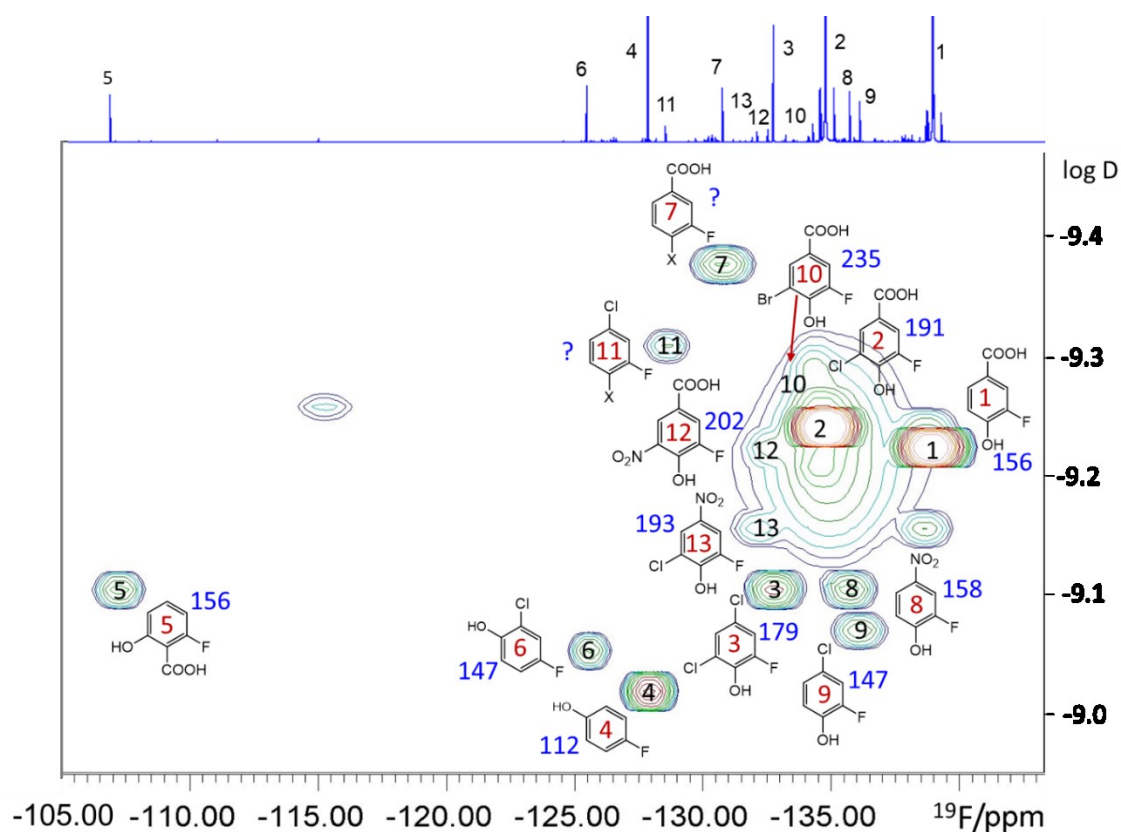

**Fig. S4.** 2D  $^{19}\text{F}$  DOSY spectrum of the reaction product mixture.

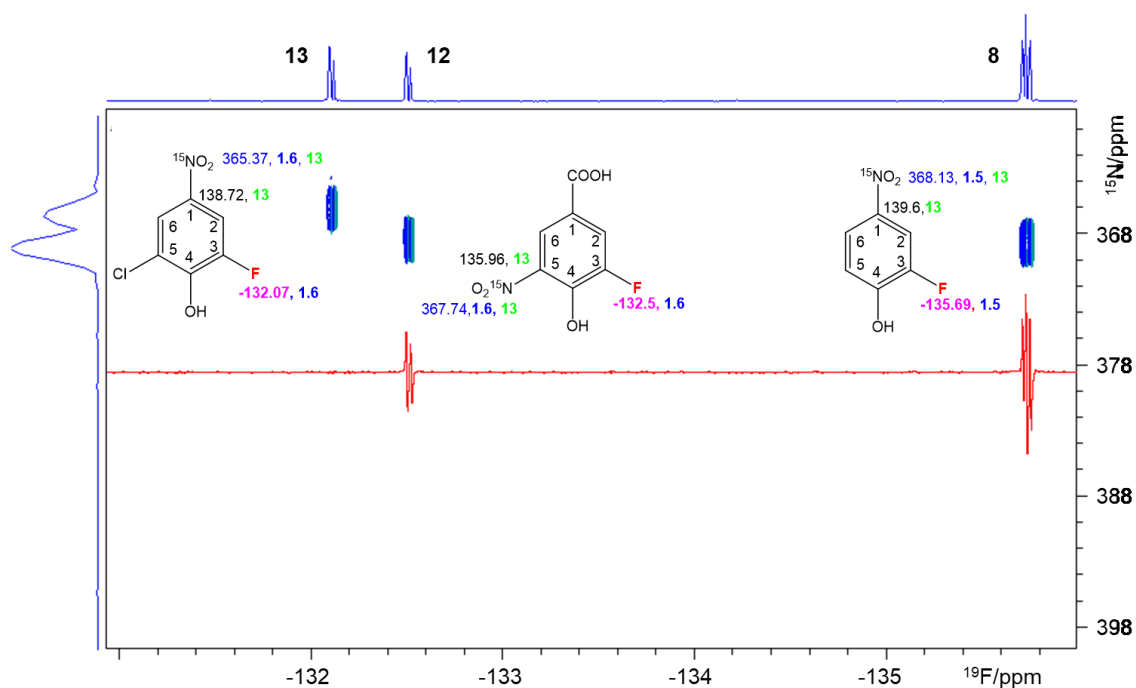

**Fig. S5.** Partial 2D  $^{19}\text{F}$ ,  $^{15}\text{N}$  HMBC spectrum of the reaction product mixture acquired with the pulse sequence of **Fig. S10** without the  $^1\text{H}$  decoupling. Internal positive projections are shown on the top and the side of the spectrum respectively. The  $F_2$  trace at 368 ppm in red shows antiphase ( $^nJ_{\text{FN}}$ ) multiplets with inphase splittings ( $^nJ_{\text{HF}}$ ) from **12** and **8**.

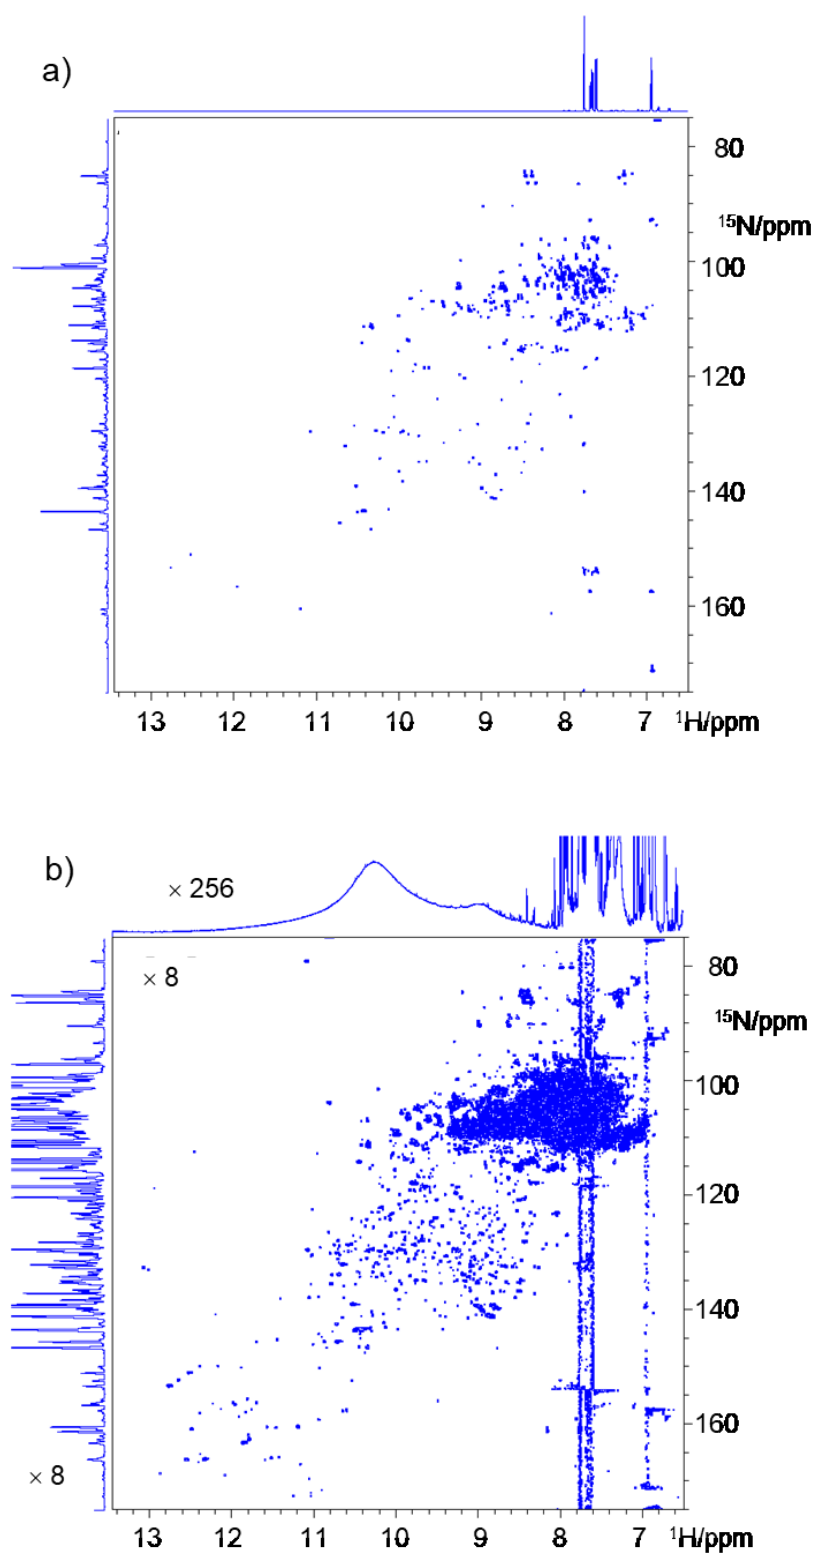

**Fig. S6.** 800 MHz 2D  $^1\text{H}$ ,  $^{15}\text{N}$  HSQC spectrum of the mixture produced by chloramination of **1** using  $^{15}\text{NH}_4\text{Cl}$ . (b) represents a vertical expansion of (a) as stated in parts of the spectrum.  $F_1$  noise visible in (b) is due to intense signals of compounds **1** and **2**.

## Timing and phase cycling of r.f. pulses of the $^{19}\text{F}$ -centered pulse sequences.

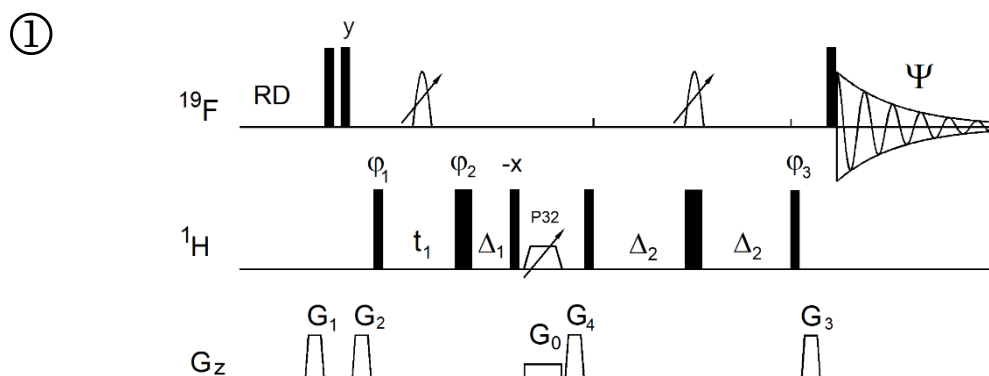

**Fig. S7.** Pulse sequence of the  $^{19}\text{F}$ -detected variable-time z-filtered 2D  $^1\text{H}$ ,  $^{19}\text{F}$  HETCOR experiment. The thin and thick filled rectangles represent high power  $90^\circ$   $^{19}\text{F}$  (p1) or  $^1\text{H}$  (p3) and  $180^\circ$  ( $^1\text{H}$ , p4) pulses, respectively. The 1 ms adiabatic CHIRP pulses (p44) are indicated by an inclined arrow. A 20 ms 60 kHz CHIRP  $^1\text{H}$  pulse (p32) was used as part of the z-filter. Unless stated otherwise, the r.f. pulses were applied from the x-axis. The delays were as follows:  $\Delta_1 = p44$ ;  $\Delta_2 =$  one half of the  $J_{\text{HF}}$  evolution;  $t_1(0)$ , the initial  $t_1$  evolution delay time =  $0.5 \cdot \text{in}0$ , where  $\text{in}0$  is the  $t_1$  increment.  $G_0 = 3\%$ ;  $G_1 = 17\%$ ;  $G_2 = 31\%$ ;  $G_3 = 24\%$ ;  $G_4 = 10.0\%$ . The following phases were used:  $\varphi_1 = x, -x$ ;  $\varphi_2 = 4x, 4(-x)$ ;  $\varphi_3 = 2y, 2(-y)$ ;  $\Psi = x, 2(-x), x$ . States-TPPI protocol was used for sign discrimination in  $F_1$  with the phase  $\varphi_1$  incremented by  $90^\circ$ . Purging of  $^{19}\text{F}$  magnetisation at the beginning of the pulse sequence by a composite  $90^\circ$   $^{19}\text{F}$  pulse and PFGs minimises the cancellation artefacts.

**Polarisation transfer efficiency.** The  $\text{H}_i \rightarrow \text{F}$  polarisation transfer efficiency in a spin system of  $n$  protons coupled to proton  $\text{H}_i$  is given by the following transfer function (neglecting relaxation):

$$I_i = \sin(\pi J_{\text{H}_i\text{F}} 2\Delta_2) \prod_{j=1}^n \cos(\pi J_{\text{H}_i\text{H}_j} 2\Delta_2) \quad (1)$$

Setting of the  $2\Delta_2$  polarisation transfer interval, therefore, depends on the values of the active,  $J_{\text{H}_i\text{F}}$ , and passive,  $J_{\text{H}_i\text{H}_j}$  coupling constants. In the absence of passive couplings,  $2\Delta_2$  should be set to  $1/(2J_{\text{H}_i\text{F}})$  yielding a transfer efficiency of 100%. For spin-systems with 1, 2 or 3 passive  $J_{\text{H}_i\text{H}_j}$  coupling constants of the same size as  $J_{\text{H}_i\text{F}}$ , the optimum timing is equal to  $1/(nJ_{\text{H}_i\text{F}})$ , where  $n = 4, 5, \text{ or } 6$ , achieving transfer efficiency of 50, 38 or 32%, respectively

In real molecules, where the  $J_{\text{HF}}$  and  $J_{\text{HH}}$  vary in size, the transfer is typically optimised for the largest  $J_{\text{HF}}$  coupling constant considering 1 or 2 passive  $J_{\text{HH}}$  passive coupling constants. In the experiments performed here, the transfer was optimised for  $J_{\text{HF}} = 10$  Hz (active) and one  $J_{\text{HH}} = 10$  Hz (passive) coupling constants, by setting  $2\Delta_2 = 1/(4 \cdot 10) = 0.025$  s (or 25 ms). Using the average  $J_{\text{HF}}$  coupling constants (in red) of aromatic protons (Table S2) and considering only the  $\sin$  term of Eqn 1, the calculated transfer efficiencies (in blue) are given on the structure below.

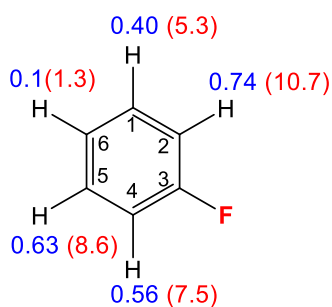

It can be seen that the transfer efficiency for individual positions reflects the sizes of  $J_{\text{HF}}$  coupling constants, nevertheless, all but the  $\text{H}_6 \rightarrow \text{F}$  transfer produce satisfactory values. In these molecules only  $J_{\text{HH}}^{\text{ortho}}$  (average value 8.6 Hz) is sufficiently large to cause an additional decrease in the polarisation transfer. Such effects are clearly visible on the cross peaks for molecule **9** in the 2D  $^1\text{H}$ ,  $^{19}\text{F}$  HETCOR spectrum presented in Fig. 4, where the  $\text{H}_2\text{F}$  cross peak is the most intense (no  $J_{\text{HH}}^{\text{ortho}}$ ), followed by the  $\text{H}_5\text{F}$  cross peak (one  $J_{\text{HH}}^{\text{ortho}}$ ), while the  $\text{H}_6\text{F}$  cross peak is too weak to be detected. Despite these effects, the sensitivity of HF correlations is not the limiting factor for the structure determination process, as commented on in the main body of the paper.

②

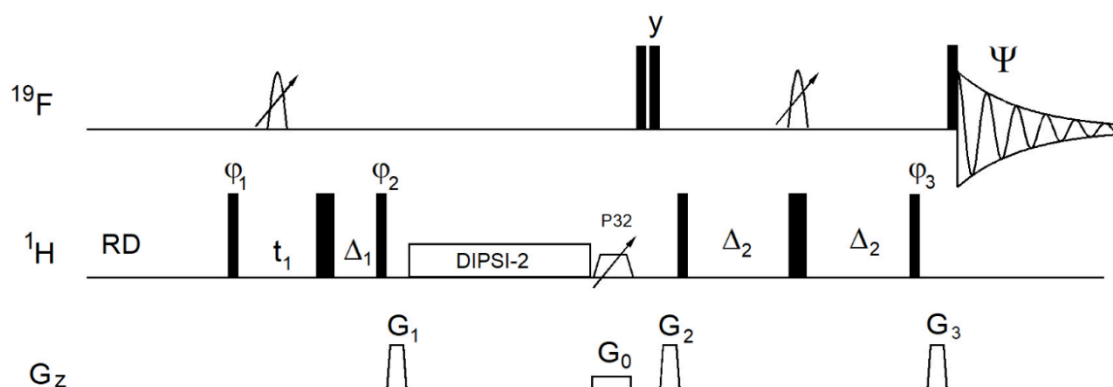

**Fig. S8.** Pulse sequence of  $^{19}\text{F}$ -detected 2D  $^1\text{H}$ ,  $^{19}\text{F}$  TOCSY-HETCOR experiments. The thin and thick filled rectangles represent high power  $90^\circ$   $^{19}\text{F}$  (p1) or  $^1\text{H}$  (p3) and  $180^\circ$  ( $^1\text{H}$ , p4) pulses, respectively. The 1 ms adiabatic CHIRP pulses (p44) are indicated by an inclined arrow. A 20 ms 60 kHz CHIRP  $^1\text{H}$  pulse (p32) was used as part of the z-filter. Unless stated otherwise, the r.f. pulses were applied from the x-axis. The delays were as follows:  $\Delta_1 = \text{p44}$ ;  $\Delta_2 =$  one half of the  $J_{\text{HF}}$  evolution;  $t_1(0)$  is the initial  $t_1$  evolution delay time =  $0.5 \cdot \text{in}_0$ , where  $\text{in}_0$  is the  $t_1$  increment.  $G_0 = 5\%$ ;  $G_1 = 17\%$ ;  $G_2 = 31\%$ ;  $G_3 = 24\%$ . The following phases were used:  $\varphi_1 = x, -x$ ;  $\varphi_2 = 4x, 4(-x)$ ;  $\varphi_3 = 2y, 2(-y)$ ;  $\Psi = x, 2(-x), x, -x, 2x, -x$  States-TPPI protocol was used for sign discrimination in  $F_1$  with the phase  $\varphi_1$  incremented by  $90^\circ$ . Purging of  $^{19}\text{F}$  magnetisation after the z-filter by a composite  $90^\circ$   $^{19}\text{F}$  pulse followed by the  $G_2$  PFG minimises the cancellation artefacts.

**Polarisation transfer efficiency.** The task of evaluating the overall  $\text{H}_i \rightarrow \text{F}$  polarisation transfer efficiency of the 2D  $^1\text{H}$ ,  $^{19}\text{F}$  TOCSY-HETCOR experiment can be split into two parts, the  $\text{H}_j \rightarrow \text{H}_i$  TOCSY transfer and the  $\text{H}_i \rightarrow \text{F}$  polarisation transfer. The former depends on the nature of the proton network only, and yields efficiencies typical for 2D  $^1\text{H}$ ,  $^1\text{H}$  TOCSY experiments; the efficiency of the latter part of the pulse sequence is given by Eqn 1. The overall efficiency is the product of the efficiencies of the two parts. Because of these considerations, this experiment should be less sensitive than the 2D  $^1\text{H}$ ,  $^{19}\text{F}$  HETCOR experiment. Nevertheless, depending on the proton network, an increase in the  $^{19}\text{F}$  signal can occur. After the initial chemical shift labelling of protons, the magnetisation is spread throughout the spin system. Taking an example of a proton that has a small  $J_{\text{HF}}$  coupling constant (e.g.  $\text{H}_6$ ), its magnetisation may end up on multiple protons with large  $J_{\text{HF}}$  coupling constants. Magnetisation of these protons is then in the second part of the pulse sequence transferred to fluorine, which means that the observed  $^{19}\text{F}$  multiplet may be a superposition of several signals. This increases its intensity. Due to the antiphase nature of the HETCOR multiplets, the inner lines of these composite multiplets may be attenuated, while the most outer parts will always add up constructively, increasing their intensity. Analysing the HF cross peak of  $\text{H}_6$  in molecule **9**, which was missing in the HETCOR experiment of Fig. S7, this proton has one large  $J_{\text{H}_6\text{H}_5} = 8.6$  Hz and one small  $J_{\text{H}_6\text{H}_2} = 2.6$  Hz. This makes the  $\text{H}_6 \rightarrow \text{H}_5$  TOCSY transfer much more efficient than the  $\text{H}_6 \rightarrow \text{H}_2$  transfer, and despite the fact that that  $J_{\text{H}_2\text{F}}$  and  $J_{\text{H}_5\text{F}}$  are of comparable size, the  $\text{H}_6 \rightarrow \text{H}_5 \rightarrow \text{F}$  transfer pathway dominates and the  $\text{H}_6, \text{F}$  cross peak has a shape of the  $\text{H}_5, \text{F}$  cross peak. The  $\text{H}_6, \text{F}$  cross peak is clearly visible in the spectrum in Fig. 4 and the sensitivity of the 2D  $^1\text{H}$ ,  $^{19}\text{F}$  TOCSY-HETCOR experiment is not the limiting factor for the structure determination process.

③

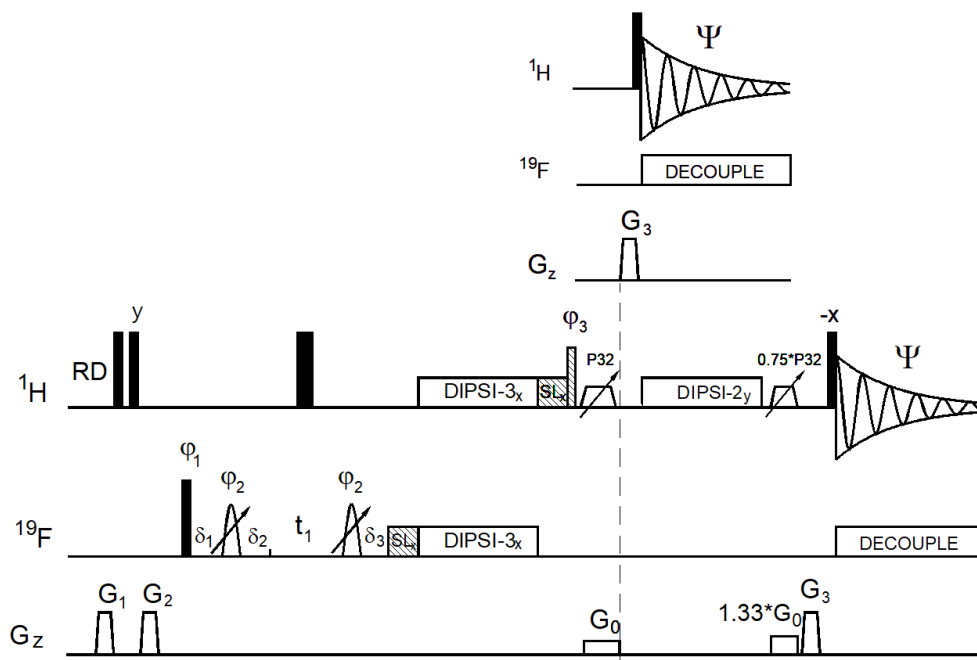

**Fig. S9.** Pulse sequence of  $^1\text{H}$ -detected 2D  $^{19}\text{F}$ ,  $^1\text{H}$  CP-DIPSI3-DIPSI2 experiments. The dashed line indicates signal acquisition before optional  $^1\text{H}$ - $^1\text{H}$  spin-lock. The thin and thick filled rectangles represent high power  $90^\circ$  ( $^1\text{H}$ , p1 or  $^{19}\text{F}$ , p3) and  $180^\circ$  ( $^1\text{H}$ , p2) pulses, respectively. The 1 ms  $^{19}\text{F}$  adiabatic CHIRP pulses (p44) are indicated by an inclined arrow. A 20 ms 60 kHz CHIRP  $^1\text{H}$  pulse (p32) was used as part of the z-filter. Unless stated otherwise, the r.f. pulses were applied from the x-axis. The delays were as follows:  $\delta_1 = 20\mu\text{s}$ ;  $\delta_2 = \delta_1 + (2/\pi)*p3$ ;  $\delta_3 = p2$ ;  $t_1(0)$  is the initial  $t_1$  evolution delay time =  $0.5*in_0$ , where  $in_0$  is the  $t_1$  increment.  $G_0 = 5\%$ ;  $G_1 = 17\%$ ;  $G_2 = 31\%$ ;  $G_2 = 66\%$ . The following phases were used:  $\phi_1 = y, -y$ ;  $\phi_2 = 4x, 4(-x)$ ;  $\phi_3 = 2y, 2(-y)$ ;  $\Psi = x, 2(-x), x$ . States-TPPI protocol was used for sign discrimination in  $F_1$  with the phase  $\phi_1$  incremented by  $90^\circ$ . Purging of  $^{19}\text{F}$  magnetisation at the beginning of the pulse sequence by a composite  $90^\circ$   $^{19}\text{F}$  pulse and PFGs minimises the cancellation artefacts.

**Polarisation transfer efficiency.** This experiment contains two spin-lock periods, the first mediates the heteronuclear ( $\text{H} \rightarrow \text{F}$ ), while the second mediates the homonuclear ( $\text{H} \rightarrow \text{H}$ ) transfer. In an isolated X, Y spin system, the efficiency of in-phase magnetisation transfer between the two spin-locked spins is proportional to  $\sin(0.5\pi J_{xy}\tau)$ ; the maximum (100%) therefore occurs for  $\tau = 1/J_{XY}$ . It is therefore advisable to set the polarisation transfer interval for the first transfer close to  $\tau = 1/J_{HF}^{max}$ , where  $J_{HF}^{max}$  is the largest HF coupling constant. Note that in this experiment, the  $\text{H} \rightarrow \text{H}$  transfer is already taking place during the  $\text{H} \rightarrow \text{F}$  spin-lock, and therefore the protons with small or zero  $J_{HF}$  coupling constants may appear in the spectra even without the additional pure  $\text{H} \rightarrow \text{H}$  transfer. This latter transfer period reinforces signal intensities and its length and efficiency depends on the nature of the proton spin system. A typical value of around 50 ms is recommended.



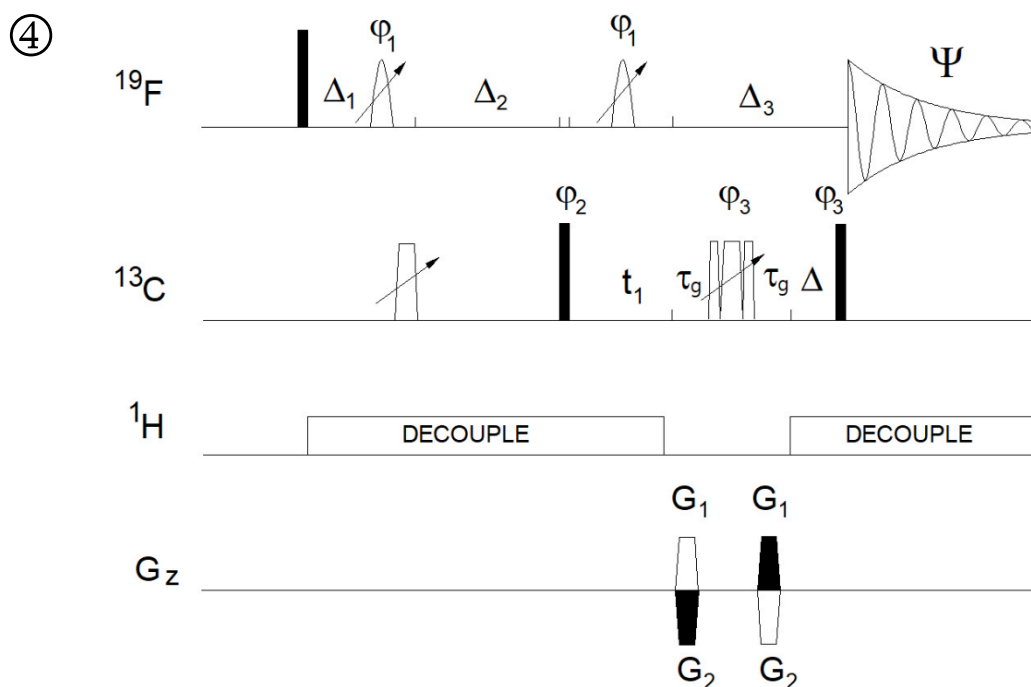

**Fig. S10.** Pulse sequence of a  $^{19}\text{F}$ -detected 2D  $^{19}\text{F}$ ,  $^{13}\text{C}$  ( $^{15}\text{N}$ ) HMBC experiment optimised for  $^nJ_{\text{FC}}$  ( $^nJ_{\text{FN}}$ ) correlations. The thin filled rectangles represent high power  $90^\circ$   $^{19}\text{F}$  (p1) or  $^{13}\text{C}$  ( $^{15}\text{N}$ ) (p3) pulses. The 1 ms adiabatic CHIRP pulses (p44) applied to  $^{19}\text{F}$  are indicated by an inclined arrow. A  $500\ \mu\text{s}$  CHIRP pulse (p14) and 2 ms composite CHIRP pulse (p24) were applied to  $^{13}\text{C}$  ( $^{15}\text{N}$ ). Unless stated otherwise, the r.f. pulses were applied from the x-axis. The delays were as follows:  $d6 = 0.25/{}^nJ_{\text{FC}}$ ;  $\Delta = p44$ ;  $\Delta_3 = 2*p16 + 2*d16 + p24 + \Delta + 8\ \mu\text{s}$ ;  $\Delta_1 = d6 - \Delta_3/2$ ;  $\Delta_2 = d6 + \Delta_3/2 - p14 + (2/\pi)*p1$ ;  $t_1(0)$  is the initial  $t_1$  evolution delay time =  $0.5*in_0$ , where  $in_0$  is the  $t_1$  increment.  $G_1 = 80\%$ ;  $G_2 = \text{const}30 * G_1$ , where  $\text{const}30 = (1 - \text{sfo}2/\text{sfo}1)/(1 + \text{sfo}2/\text{sfo}1)$  and  $\text{sfo}1$  and  $\text{sfo}2$  are  $^{19}\text{F}$  and  $^{13}\text{C}$  ( $^{15}\text{N}$ ) frequencies, respectively.  $\varphi_1 = 2x, 2(-x)$ ;  $\varphi_2 = x, -x$ ;  $\varphi_3 = 4x, 4(-x)$ ;  $\Psi = 2(x, -x), 2(-x, x)$ . Echo-anti echo protocol was used with PFGs changing sign between real and imaginary increments. Phases  $\varphi_2$  and  $\Psi$  were incremented by  $180^\circ$  together with the PFG sign change.

**Polarisation transfer efficiency.** The signal intensity in this experiment is proportional to  $\sin(\pi J_{\text{FC}}(\Delta_1 + \Delta_2))$ . For spin systems with one  $^{19}\text{F}$  atom, there are no passive coupling constants that could decrease the efficiency of the polarisation transfer. At the same time,  $^1\text{H}$  decoupling ensures that proton-fluorine couplings do not interfere either. The HMBC experiment can therefore achieve high levels of transfer efficiency by setting the evolution interval to  $\Delta_1 + \Delta_2 = 1/(2J_{\text{FC}}^{\text{max}})$ . In experiments performed here, the transfer was optimised for a 20 Hz  $J_{\text{FC}}$  coupling constant, yielding  $\Delta_1 + \Delta_2 = 25\ \text{ms}$ . Using average  $^nJ_{\text{FC}}$  coupling constants (in red) for the aromatic carbons (Table S3), the transfer efficiencies for a 25 ms evolution interval are stated (in blue) on the structure below.

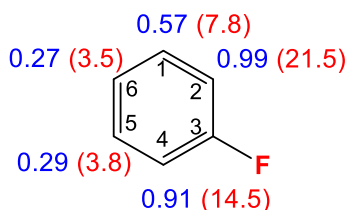

It can be seen that transfer efficiency at individual positions reflects the sizes of  $J_{\text{FC}}$  coupling constants, nevertheless, even a  $\sim 6$  fold smaller  $J_{\text{FC}6}$  (3.5 Hz) produced transfer only 3.7 times lower than the  $J_{\text{FC}2}$  of 21.53 Hz. The trends in cross peak intensities outlined here are clearly visible in the 2D  $^{19}\text{F}$ ,  $^{13}\text{C}$  HMBC spectrum of molecule **9** in Fig. 4. To rebalance the intensities in favour of cross peaks for carbons with smaller  $J_{\text{FC}}$  constants, the evolution interval could be lengthened, e.g. set to  $\Delta_1 + \Delta_2 = 1/(1.4J_{\text{FC}}^{\text{max}})$  without running the risk of zeroing accidentally cross peaks mediated by large  $J_{\text{FC}}$  coupling constants. Overall, due to the absence of passive coupling constants, this crucial experiment for the structure determination process performs well despite the natural spread of  $^nJ_{\text{FC}}$  coupling constants.

④'

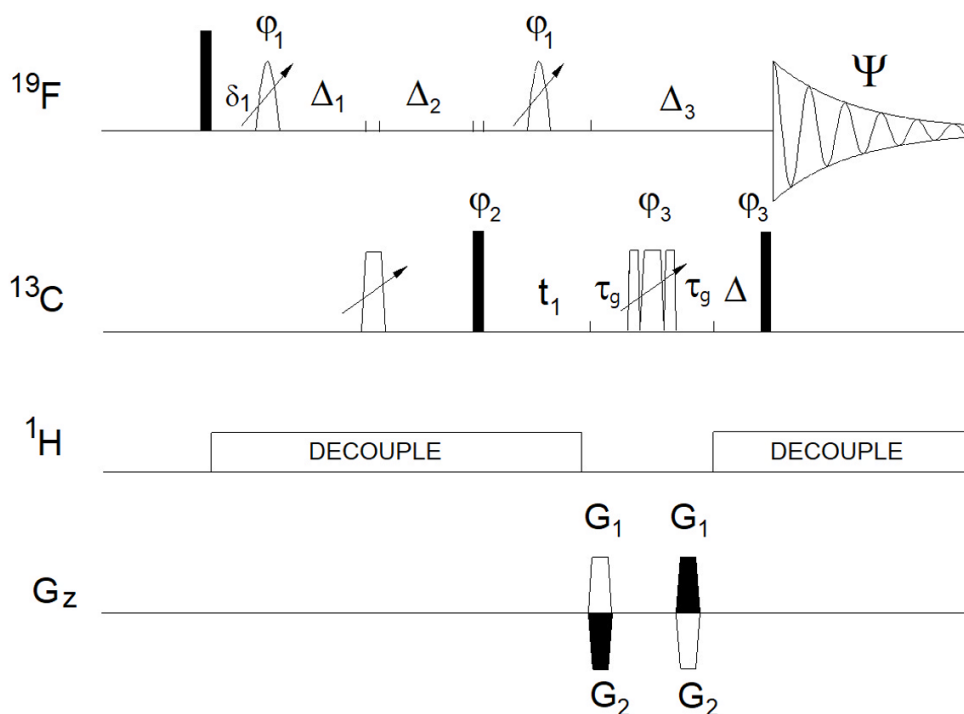

**Fig. S11.** Pulse sequence of  $^{19}\text{F}$ -detected 2D  $^{19}\text{F}$ ,  $^{13}\text{C}$  HMBC experiment optimised for  $^1J_{\text{FC}}$  correlations. The thin filled rectangles represent high power  $90^\circ$   $^{19}\text{F}$  (p1) or  $^{13}\text{C}$  (p3) pulses. The 1 ms adiabatic CHIRP pulses (p44) applied to  $^{19}\text{F}$  are indicated by an inclined arrow. A  $500\ \mu\text{s}$  CHIRP pulse (p14) and 2 ms composite CHIRP pulse (p24) were applied to  $^{13}\text{C}$ . Unless stated otherwise, the r.f. pulses were applied from the x-axis. The delays were as follows:  $d_6 = 0.5/{}^1J_{\text{FC}}$ ;  $\Delta = p44$ ;  $\delta_1 = 20\ \mu\text{s}$ ;  $\Delta_3 = 2 \cdot p16 + 2 \cdot d16 + p24 + \Delta + 8\ \mu\text{s}$ ;  $\Delta_1 = (\Delta_3 - p14 - d6)/2 + (2/\pi) \cdot p1 + \delta_1$ ;  $\Delta_2 = (\Delta_3 - p14 + d6)/2$ ;  $t_1(0)$  is the initial  $t_1$  evolution delay time =  $0.5 \cdot \text{in}0$ , where  $\text{in}0$  is the  $t_1$  increment.  $G_1 = 80\%$ ;  $G_2 = \text{cnst}30 \cdot G_1$ , where  $\text{cnst}30 = (1 - \text{sfo}2/\text{sfo}1)/(1 + \text{sfo}2/\text{sfo}1)$  and  $\text{sfo}1$  and  $\text{sfo}2$  are  $^{19}\text{F}$  and  $^{13}\text{C}$  frequencies, respectively.  $\varphi_1 = 2x, 2(-x)$ ;  $\varphi_2 = x, -x$ ;  $\varphi_3 = 4x, 4(-x)$ ;  $\Psi = 2(x, -x), 2(-x, x)$ . Echo-anti echo protocol was used with PFGs changing the sign between real and imaginary increments. Phases  $\varphi_2$  and  $\Psi$  were incremented by  $180^\circ$  together with the sign change.

**Polarisation transfer efficiency.** The signal intensity in this experiment is proportional to  $\sin(\pi {}^1J_{\text{FC}} d_6)$ . Depending on the spread of  ${}^1J_{\text{FC}}$  values, this experiment can be optimised very well, with  $d_6 = 1/(2 {}^1J_{\text{FC}}^{\text{max}})$ . For the average  ${}^1J_{\text{FC}}$  for these compounds (245.94 Hz, Table S2),  $d_6 = 2.03$  ms, yielding 100% transfer efficiency.

⑤

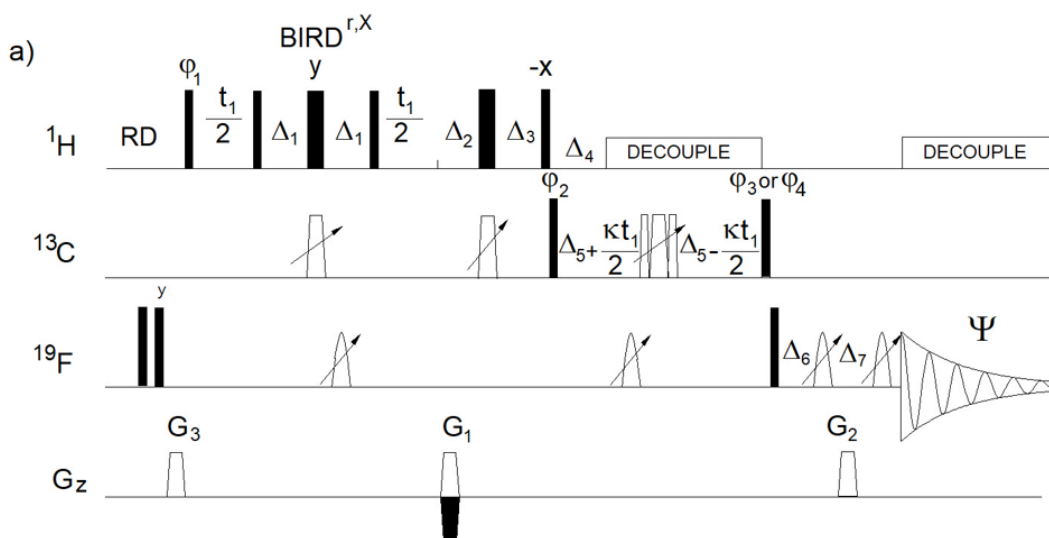

**Fig. S12.** Pulse sequence of  $^1\text{H}$ -detected 2D  $^1\text{H}^{13}\text{C}^{19}\text{F}$  experiment for the correlation via  $^1J_{\text{HC}}$  and  $^nJ_{\text{FC}}$ . The thin and thick filled rectangles represent high power  $90^\circ$  ( $^1\text{H}$ , p1 or  $^{19}\text{F}$ , p3) and  $180^\circ$  ( $^1\text{H}$ , p2) pulses, respectively. The 1 ms adiabatic CHIRP pulses (p44) applied to  $^{19}\text{F}$  are indicated by an inclined arrow. A  $500\ \mu\text{s}$  CHIRP pulse (p14) and 2 ms composite CHIRP pulse (p24) were applied to  $^{13}\text{C}$ . Unless stated otherwise, the r.f. pulses were applied from the x-axis. The delays were as follows:  $d_2 = 0.25/{}^1J_{\text{HC}}$ ;  $d_3 = 0.5/{}^1J_{\text{HC}}$ ;  $d_4 = 0.25/{}^nJ_{\text{FC}}$ ;  $d_6 = \text{const}1/{}^1J_{\text{HC}}$ , where  $\text{const}1=0.5$  for CH and  $0.25$  for  $\text{CH}_2$  groups;  $\Delta_1 = d_3 - p14/2$ ;  $\Delta_2 = d_2 - p14/2 - p16 - d16$ ;  $\Delta_3 = d_2 - p14/2 - 2t_1(0)$ ;  $\Delta_4 = d_6$ ;  $\Delta_5 = d_4$ ;  $\Delta_6 = p16 + d16 - (2/\pi)p1 + 4\ \mu\text{s}$ ;  $\Delta_7 = p16 + d16 + 4\ \mu\text{s}$ , where p16 and d16 are the PFG length and the recovery time, respectively.  $G_1 = 40\%$ ;  $G_2 = 42.51\%$ ;  $G_3 = 13\%$ ;  $\phi_1 = y, -y$ ;  $\phi_2 = 4x, 4(-x)$ ;  $\phi_3 = 2x, 2(-x)$ ;  $\phi_4 = 2y, 2(-y)$ ;  $\Psi = x, 2(-x), x, -x, 2x, -x$ . Echo-anti echo protocol was used with  $G_1$  changing sign between real and imaginary increments. Phases  $\phi_1$  and  $\Psi$  were incremented by  $180^\circ$  together with the sign change. Two interleaved experiments are acquired applying either  $\phi_3$  or  $\phi_4$  phase to the last  $90^\circ$   $^{13}\text{C}$  pulse.

**Polarisation transfer efficiency.** The  $\text{H} \rightarrow \text{C} \rightarrow \text{F}$  polarisation transfer pathway of this pulse sequence (neglecting relaxation) is given by the following transfer function:

$$A \quad | \quad B \quad | \quad C \quad | \quad D$$

$$I_i = \sin(\pi {}^1J_{\text{CH}}d_3) \times \sin(\pi {}^1J_{\text{CH}}d_6) \prod_{j=0}^n \cos^j(\pi {}^1J_{\text{CH}}d_6) \times \sin(\pi J_{\text{FC}}2d_4), \quad (2)$$

where  $j = 0, 1$  or  $2$  for CH,  $\text{CH}_2$  or  $\text{CH}_3$  carbons, respectively. This equation contains four terms, A, to D. The first, **A**, describes the  $\text{H} \rightarrow \text{C}$  polarisation transfer via  ${}^1J_{\text{CH}}$  coupling constants and can be optimised to achieve near 100% transfer efficiency by setting  $d_3$  to  $1/(2{}^1J_{\text{CH}})$ . The terms **B** and **C** describe refocusing of the antiphase  $^{13}\text{C}$  magnetisation with respect to the  ${}^1J_{\text{CH}}$  coupling constants. For CH moieties these can be optimised to near 100% transfer efficiency by setting  $d_6$  to  $1/(2{}^1J_{\text{CH}})$ . For  $\text{CH}_2$  and  $\text{CH}_3$  carbons, a transfer efficiency of 50 and 38% is achieved by setting  $d_6$  to  $1/(4{}^1J_{\text{CH}_2})$  and  $1/(5{}^1J_{\text{CH}_3})$ , respectively. For molecules with one  $^{19}\text{F}$  atom, a 100% efficiency is achieved for the term **D** by setting  $d_4$  to  $1/(4J_{\text{FC}}^{\text{max}})$ . To enhance the intensity of cross peaks with smaller  $J_{\text{FC}}$  couplings, the  $\Delta_5$  interval can be set to  $1/(2.8J_{\text{FC}}^{\text{max}})$ . Alternatively, because this experiment is typically acquired after the HMQC experiment, which provides exact values of  ${}^nJ_{\text{FC}}$  couplings, a bespoke optimisation can be performed. The spectrum in Fig. 4 was acquired with  $d_4$  equal to 50 ms, which using the average coupling constants for carbons C2, C5 and C6 (Table S3), yielded the transfer efficiencies of 46, 93 and 89 % for the **D** term, respectively. These predictions agree with the intensity of cross peaks of compound **9** in Fig. 4d, where the  $\text{FH}_2$  cross peak has approximately half the intensity of the  $\text{FH}_5$  or  $\text{FH}_6$  cross peaks. Although less sensitive than the HMQC experiments, sufficient signal was obtained for the compounds above the sensitivity threshold.

**Table S1.** Parameters of the NMR experiments performed on the reaction mixture<sup>a</sup>.

| Parameter /experiment                                                          | RD   NS /s   - | J evolution delay /ms | SW <sub>1</sub>   SW <sub>2</sub> /ppm | TD <sub>1</sub>   TD <sub>2</sub> /points | AQ <sub>1</sub>   AQ <sub>2</sub> /ms   /s | Overall time /h |
|--------------------------------------------------------------------------------|----------------|-----------------------|----------------------------------------|-------------------------------------------|--------------------------------------------|-----------------|
| 1D <sup>19</sup> F                                                             | 4   2k         | -                     | 147.6                                  | 256k                                      | 1.89                                       | 3.3             |
| <sup>19</sup> F-detected VT, z-filtered <sup>1</sup> H, <sup>19</sup> F HETCOR | 1.6   24       | 25                    | 8.0   62.3                             | 320   32k                                 | 25   0.35                                  | 4.19            |
| <sup>19</sup> F-detected <sup>1</sup> H, <sup>19</sup> F TOCSY-HETCOR          | 1.6   24       | 60 (H→H)<br>25        | 8.0   62.3                             | 320   32k                                 | 25   0.35                                  | 4.19            |
| 2D <sup>19</sup> F, <sup>1</sup> H CP-DIPSI3-DIPSI2                            | 2   16         | 90 (F→H)<br>60 (H→H)  | 16   12                                | 768   8k                                  | 51   0.68                                  | 9.2             |
| 2D <sup>19</sup> F, <sup>13</sup> C HMBC ( <sup>n</sup> J <sub>FC</sub> )      | 2   16         | 25                    | 120   99.6                             | 768   32k                                 | 25   0.35                                  | 9.2             |
| 2D <sup>19</sup> F, <sup>15</sup> N HMBC ( <sup>n</sup> J <sub>FN</sub> )      | 2   8          | 167                   | 34.6   200                             | 1k   32k                                  | 5.1   0.84                                 | 4.9             |
| (3, 2)D <sup>1</sup> H <sup>1</sup> C <sup>n</sup> F                           | 1.6   48       | 100                   | 8.0   34.6                             | 2 × 256   32k                             | 26.7   0.84                                | 11.6            |
| 2D <sup>1</sup> H, <sup>15</sup> N HSQC <sup>b</sup>                           | 2   16         | 5.6                   | 100   20.2                             | 512   1k                                  | 31.6   0.127                               | 5               |
| <sup>19</sup> F DOSY <sup>c,d</sup>                                            | 2   256        | -                     | -   34.6                               | 16   128k                                 | 3.4                                        | 4               |

<sup>a</sup> Acquired at 500 MHz; <sup>b</sup> Acquired at 800 MHz; <sup>c</sup> For a wider range of <sup>19</sup>F resonances the use of adiabatic pulses is recommended<sup>1,2</sup> <sup>d</sup> Acquired using a BRUKER program, ledbpgp2s, modified according to ref.<sup>3</sup> The diffusion time was set to 100ms and bipolar de-/rephasing gradients (1 ms) were applied at the strength of 5 to 95 % of the nominal value of 56 Gauss/cm increasing linearly

**Table S2.** Summary of <sup>n</sup>J<sub>HF</sub> coupling constants (/Hz) for the 13 characterised aromatic compounds.

| Proton Compound | H1<br><sup>4</sup> J <sub>HF</sub> | H2<br><sup>3</sup> J <sub>HF</sub> | H4<br><sup>3</sup> J <sub>HF</sub> | H5<br><sup>4</sup> J <sub>HF</sub> | H6<br><sup>5</sup> J <sub>HF</sub> |
|-----------------|------------------------------------|------------------------------------|------------------------------------|------------------------------------|------------------------------------|
| <b>1*</b>       | -                                  | 11.5                               | -                                  | 8.9                                | 0.8                                |
| <b>2</b>        | -                                  | 10.9                               | -                                  | -                                  | 1.5                                |
| <b>3</b>        | -                                  | 10.2                               | -                                  | -                                  | 1.8                                |
| <b>4*</b>       | 4.4                                | 8.5                                | 8.5                                | 4.4                                | -                                  |
| <b>5</b>        | 6.1                                | 10.9                               | -                                  | -                                  | 0.9                                |
| <b>6*</b>       | -                                  | 8.5                                | 6.5                                | 6.5                                | -                                  |
| <b>7*</b>       | -                                  | 10.5                               | -                                  | 7.3                                | < 0.5                              |
| <b>8*</b>       | -                                  | 10.8                               | -                                  | 8.7                                | 1                                  |
| <b>9</b>        | -                                  | 10.8                               | -                                  | 9.3                                | 1.2                                |
| <b>10</b>       | -                                  | 10.9                               | -                                  | -                                  | 1.5                                |
| <b>11</b>       | -                                  | 10.5                               | -                                  | 8                                  | 0.5                                |
| <b>12</b>       | -                                  | 10.6                               | -                                  | -                                  | 1.7                                |
| <b>13</b>       | -                                  | 10.4                               | -                                  | -                                  | 1.8                                |
| Average         | 5.25                               | 10.71                              | 7.50                               | 8.64                               | 1.27                               |
| Std dev         | ±0.85                              | ±0.34                              | ±1.00                              | ±0.88                              | ±0.43                              |

\* values given are the first order approximations as protons are strongly coupled for these compounds; highlighted coupling constants of compounds 4-6 were excluded from calculating the average values because their structures differ significantly from the rest of the compounds.

**Table S3.** Summary of  $^{1,n}J_{FC}$  coupling constants (/Hz) of 13 characterised aromatic compounds.

| Carbon Compound | <b>C1</b>  | <b>C2</b>  | <b>C3</b>  | <b>C4</b>  | <b>C5</b>  | <b>C6</b>  | <b>C7 (COOH)</b> |
|-----------------|------------|------------|------------|------------|------------|------------|------------------|
|                 | $^3J_{FC}$ | $^2J_{FC}$ | $^1J_{FC}$ | $^2J_{FC}$ | $^3J_{FC}$ | $^4J_{FC}$ | $^4J_{FC}$       |
| <b>1</b>        | 6.1        | 20.4       | 241.4      | 12.9       | 2.5        | 3.2        | 2.9              |
| <b>2</b>        | 7.2        | 20.7       | 242.5      | 16.1       | 4.3        | 3.2        | 3.2              |
| <b>3</b>        | 10.7       | 22.9       | 245.0      | 16.1       | 5.5        | 3.2        |                  |
| <b>4</b>        | 7.9        | 23.2       | 234.6      | 23.2       | 7.9        | 2.5        |                  |
| <b>5</b>        | 12.2       | 23.2       | 259.3      | 13.2       | 3.6        | 3.2        | 3.2*             |
| <b>6</b>        | 10.7       | 26.1       | 238.9      | 22.9       | 8.6        | 2.5        | -                |
| <b>7</b>        | 6.4        | 19.7       | 251.1      | 12.9       | N.D.       | 3.9        | 3.2              |
| <b>8</b>        | 7.5        | 23.2       | 245.3      | 12.9       | 3.6        | 3.2        |                  |
| <b>9</b>        | 8.6        | 22.2       | 243.9      | 12.9       | 3.6        | 3.6        |                  |
| <b>10</b>       | 6.8        | 20.7       | 242.8      | 16.5       | 3.2        | 3.2        | 2.9              |
| <b>11</b>       | 8.9        | 21.1       | 253.6      | 12.9       | N.D.       | 3.9        |                  |
| <b>12</b>       | 6.8        | 20.0       | 247.8      | 16.1       | 3.2        | 3.9        | 3.6              |
| <b>13</b>       | 8.9        | 24.3       | 246.0      | 16.1       | 4.3        | 3.4        |                  |
| Average         | 7.79       | 21.53      | 245.94     | 14.52      | 3.77       | 3.49       | 3.15             |
| Std dev         | ±1.38      | ±1.46      | ±3.68      | ±1.65      | ±0.85      | ±0.31      | 0.27             |

\* this is a  $^3J_{FC}$ ; highlighted coupling constants of compounds 4-6 were excluded from calculating the average values because their structures differ significantly from the rest of the compounds.

**Table S4.** Summary of  $^{13}C$ -induced  $^{19}F$  isotopic shifts<sup>a</sup> (/ppb) for the 13 characterised aromatic compounds.

| Compound  | <b>C1</b> | <b>C2</b> | <b>C3</b> | <b>C4</b> | <b>C5</b> | <b>C6</b> | <b>C7</b> |
|-----------|-----------|-----------|-----------|-----------|-----------|-----------|-----------|
| <b>1</b>  | 5.8       | 24.0      | 78.7      | 25.9      | 4.2       | 2.7       | 0.8       |
| <b>2</b>  | 5.1       | 24.1      | 80.3      | 25.2      | 5.1       | 3.9       | 0.0       |
| <b>3</b>  | 4.1       | 22.8      | 81.6      | 25.4      | 4.5       | 4.1       | 0.0       |
| <b>4</b>  | 6.6       | 26.0      | 83.3      | 26.0      | 6.6       | 7.7       | 0.0       |
| <b>5</b>  | 4.7       | 27.1      | 87.1      | 21.0      | 4.7       | 3.5       | 0.0       |
| <b>6</b>  | 5.7       | 24.3      | 84.7      | 25.4      | 6.4       | 7.6       | 0.0       |
| <b>7</b>  | 5.1       | 23.7      | 85.7      | 26.4      | N.D.      | 3.2       | 0.9       |
| <b>8</b>  | 5.1       | 24.1      | 80.3      | 25.2      | 5.1       | 3.9       | 0.9       |
| <b>9</b>  | 5.2       | 23.4      | 80.4      | 26.5      | 4.4       | 3.7       | 0.0       |
| <b>10</b> | 6.3       | 25.6      | 82.3      | 26.4      | 5.5       | 4.7       | 1.3       |
| <b>11</b> | 4.5       | 22.7      | 86.6      | 26.2      | N.D.      | 3.0       | 0.0       |
| <b>12</b> | 6.4       | 27.3      | 83.2      | 24.7      | 4.1       | 6.4       | 2.2       |
| <b>13</b> | 6.6       | 24.5      | 83.0      | 26.4      | 5.5       | 5.0       | 0.0       |
| Average   | 5.5       | 24.6      | 82.9      | 25.4      | 5.1       | 4.6       | 0.5       |
| Stdev     | ±0.8      | ±1.4      | ±2.5      | ±1.4      | ±0.8      | ±1.6      | 0.7       |

<sup>a</sup> calculated as  $10^3 \times [v_{\delta}(^{19}F_{12C}) - v_{\delta}(^{19}F_{13C})] / v_L(^{19}F)$  where  $v_{\delta}$  and  $v_L$  are given in Hz and MHz respectively; highlighted coupling constants of compounds 4-6 were excluded from calculating the average values because their structure differs significantly from the rest of the compounds.

**Table S5.** Summary of  $^{19}\text{F}$ ,  $^1\text{H}$ ,  $^{13}\text{C}$  and  $^{15}\text{N}$  NMR parameters for the 13 characterised aromatic compounds.

| Compound       | $^1\text{H}/^{19}\text{F}$ NMR parameters <sup>a-d</sup>                                                                                                      | $^{13}\text{C}/^{19}\text{F}$ NMR parameters <sup>c,e,f,g</sup>                                                                                                     |
|----------------|---------------------------------------------------------------------------------------------------------------------------------------------------------------|---------------------------------------------------------------------------------------------------------------------------------------------------------------------|
| 1              | <p> <math>^1\text{H}</math> NMR parameters: 7.68 (d, 2.0), 7.66 (d, 2.0), 6.94 (t, 8.9).<br/> <math>^{19}\text{F}</math> NMR parameter: -138.87.         </p> | <p> <math>^{13}\text{C}</math> NMR parameters: 121.90, 126.71, 117.00, 116.98, 150.85, 149.79.<br/> <math>^{19}\text{F}</math> NMR parameter: -138.87.         </p> |
| 2              | <p> <math>^1\text{H}</math> NMR parameters: 7.75 (d, 1.5), 7.61 (d, 1.95).<br/> <math>^{19}\text{F}</math> NMR parameter: -134.71.         </p>               | <p> <math>^{13}\text{C}</math> NMR parameters: 121.75, 126.87, 115.40, 122.03, 151.33, 146.30.<br/> <math>^{19}\text{F}</math> NMR parameter: -134.71.         </p> |
| 3              | <p> <math>^1\text{H}</math> NMR parameters: 7.09 (d, 1.8), 7.05 (d, 2.4).<br/> <math>^{19}\text{F}</math> NMR parameter: -132.75.         </p>                | <p> <math>^{13}\text{C}</math> NMR parameters: 122.98, 124.66, 114.76, 122.93, 151.8, 141.19.<br/> <math>^{19}\text{F}</math> NMR parameter: -132.75.         </p>  |
| 4 <sup>h</sup> | <p> <math>^1\text{H}</math> NMR parameters: 6.72 (d, 4.4), 6.86 (d, 8.5).<br/> <math>^{19}\text{F}</math> NMR parameter: -127.92.         </p>                | <p> <math>^{13}\text{C}</math> NMR parameters: 115.71, 153.18, 115.10, 115.71, 156.51.<br/> <math>^{19}\text{F}</math> NMR parameter: -127.92.         </p>         |

|                |                                                                                                                        |                                                                                                                                                                      |
|----------------|------------------------------------------------------------------------------------------------------------------------|----------------------------------------------------------------------------------------------------------------------------------------------------------------------|
| 5 <sup>i</sup> | <p> <sup>1</sup>H NMR peaks (ppm): 7.36, 6.58, 6.70, 6.1, 8.6, 8.2, 10.9, 8.2, 1.0, 0.9, -107.32, 170.84.         </p> | <p> <sup>13</sup>C NMR peaks (ppm): 134.78, 112.57, 163.08, 102.89, 170.84, 106.18, 162.52, 12.2, 3.2, 3.6, 13.2, -107.32, 23.2, 259.3, 3.2.         </p>            |
| 6 <sup>j</sup> | <p> <sup>1</sup>H NMR peaks (ppm): 7.05, 6.85, 6.87, 2.2, 8.5, 6.5, -125.59.         </p>                              | <p> <sup>13</sup>C NMR peaks (ppm): 149.50, 120.48, 116.14, 155.76, 113.94, 2.5, 10.7, 26.1, 238.9, 22.9, -125.59.         </p>                                      |
| 7 <sup>k</sup> | <p> <sup>1</sup>H NMR peaks (ppm): 7.96, 7.94, 7.54, &lt;0.5, 0, 10.5, 7.3, -130.81.         </p>                      | <p> <sup>13</sup>C NMR peaks (ppm): 165.92, 132.60, 127.02, N.D., 140.10, 3.2, 6.4, 3.9, 12.9, 118.56, 153.19, 19.7, 251.1, -130.81.         </p>                    |
| 8 <sup>l</sup> | <p> <sup>1</sup>H NMR peaks (ppm): 7.91, 7.92, 8.4, 2.2, 1, 10.5, 8.7, -135.69.         </p>                           | <p> <sup>13</sup>C NMR peaks (ppm): 368.13, 139.6, 120.82, 116.87, 151.97, 1.5, 13, 7.5, 13, 3.2, 3.6, 12.9, 111.86, 150.23, 23.2, 245.3, -135.69, 1.5.         </p> |
| 9              | <p> <sup>1</sup>H NMR peaks (ppm): 6.93, 7.04, 8.6, 2.6, 1.2, 10.8, 8.6, 9.3, -136.09.         </p>                    | <p> <sup>13</sup>C NMR peaks (ppm): 123.23, 124.14, 118.23, 143.9, 123.23, 8.6, 3.6, 3.6, 12.9, 116.0, 151.3, 22.2, 243.9, -136.09.         </p>                     |

|                 |                                                                                                                                                                                                                                                                                             |                                                                                                                                                                                                                  |
|-----------------|---------------------------------------------------------------------------------------------------------------------------------------------------------------------------------------------------------------------------------------------------------------------------------------------|------------------------------------------------------------------------------------------------------------------------------------------------------------------------------------------------------------------|
| 10              | <p>Chemical structure of 2-bromo-4-fluorobenzoic acid. Proton chemical shifts (ppm): 7.91 (H-6), 7.64 (H-2). Coupling constants (Hz): <math>J_{HH}</math> (1.5), <math>J_{HF}</math> (10.9), <math>J_{FC}</math> (-134.23). Other parameters: N.R. (not resolved).</p>                      | <p><math>^{13}C</math> NMR chemical shifts (ppm): 166.46, 122.33, 129.96, 115.90, 110.66, 150.87, 147.29. Coupling constants (Hz): 2.9, 6.8, 3.2, 20.7, 3.2, 242.8, 16.5, -134.23.</p>                           |
| 11              | <p>Chemical structure of 2-chloro-4-fluorobenzoic acid. Proton chemical shifts (ppm): 7.31 (H-6), 7.44 (H-2), 7.45 (H-5). Coupling constants (Hz): <math>J_{HH}</math> (0.5), <math>J_{HF}</math> (10.5), <math>J_{FC}</math> (-128.57). Other parameters: 9.1, 8, 9.1, N.R., X.</p>        | <p><math>^{13}C</math> NMR chemical shifts (ppm): 134.42, 125.97, N.D., 135.67, 118.12, 153.5, 118.12. Coupling constants (Hz): 8.9, 3.9, 12.9, 21.1, 253.6, -128.57.</p>                                        |
| 12 <sup>m</sup> | <p>Chemical structure of 2-nitro-4-fluorobenzoic acid. Proton chemical shifts (ppm): 8.41 (H-6), 7.93 (H-2). Coupling constants (Hz): <math>J_{HH}</math> (1.7), <math>J_{HF}</math> (10.6), <math>J_{FC}</math> (-132.5). Other parameters: N.R., O<sub>2</sub>N, F, OH.</p>               | <p><math>^{13}C</math> NMR chemical shifts (ppm): 165.50, 121.19, 121.94, 121.20, 135.96, 152.0, 367.74, 146.63, 16.1. Coupling constants (Hz): 3.6, 6.8, 3.9, 20.0, 3.2, 247.8, 1.6, 13, 16.1, -132.5, 1.6.</p> |
| 13 <sup>n</sup> | <p>Chemical structure of 2-chloro-4-fluoro-6-nitrobenzoic acid. Proton chemical shifts (ppm): 8.01 (H-6), 7.90 (H-2). Coupling constants (Hz): <math>J_{HH}</math> (1.7), <math>J_{HF}</math> (10.4), <math>J_{FC}</math> (-132.07). Other parameters: N.R., NO<sub>2</sub>, Cl, F, OH.</p> | <p><math>^{13}C</math> NMR chemical shifts (ppm): 365.37, 138.72, 121.17, 110.51, 122.32, 150.57, 148.62. Coupling constants (Hz): 1.6, 13, 8.9, 24.3, 4.3, 246.0, 16.1, -132.07, 1.6.</p>                       |

<sup>a</sup>  $\delta_H$ /ppm (black); <sup>b</sup>  $J_{HH}$ /Hz (blue); <sup>c</sup>  $\delta_F$ /ppm (magenta); <sup>d</sup>  $J_{HF}$ /Hz (red); <sup>e</sup>  $\delta_F$ /ppm (black); <sup>f</sup>  $J_{FC}$ /Hz (red); <sup>g</sup>  $J_{FN}$ /Hz and  $\delta^{15}N$ /ppm (cyan); <sup>h,m,n</sup>  $J_{NC}$ /Hz (green); <sup>h,i,l</sup> literature chemical shift data for compounds: **4**, **4**, **5**, **6** (<https://sdfs.db.aist.go.jp/sdfs/cgi-bin/landingpage?sdfsno=4176>), **8**; <sup>6</sup>  $J_{HF}$  and  $J_{HH}$  were determined as the first order approximation of a strongly coupled spin system. <sup>k</sup> X stands for unknown; N.D. – not detected. N.R. – not resolved

## References

1. M. Foroozandeh, M. Nilsson and G. A. Morris, *Journal of Magnetic Resonance*, 2019, **302**, 28-33.
2. N. Khaneja, *Journal of Magnetic Resonance*, 2017, **282**, 32-36.
3. M. D. Pelta, G. A. Morris, M. J. Stchedroff and S. J. Hammond, *Magnetic Resonance in Chemistry*, 2002, **40**, S147-S152.
4. M. J. Zhang, H. X. Li, H. Y. Li and J. P. Lang, *Dalton Transactions*, 2016, **45**, 17759-17769.
5. J. M. Silla, C. J. Duarte, R. Rittner and M. P. Freitas, *Rsc Advances*, 2013, **3**, 25765-25768.
6. R. D. Chambers, J. Hutchinson, M. E. Sparrowhawk, G. Sandford, J. S. Moilliet and J. Thomson, *Journal of Fluorine Chemistry*, 2000, **102**, 169-173.
